# Supplementary material for: Influence of carbon and fluorine on potassium niobate anode material for sodium-ion battery applications
Source: Royal Society of Chemistry journal article supplement (doi:10.1039/d5se00071h), 2025-01-01
Supplement: d5se00071h1.pdf [file d5se00071h1.pdf]

## Supplementary Information

### **Influence of Carbon and Fluorine on Potassium Niobate Anode Material for Sodium-ion Batteries**

Y Bhaskara Rao, C. André Ohlin\*

Department of Chemistry, Umeå University, Umeå 90718, Sweden

---

\*Corresponding author: [andre.ohlin@umu.se](mailto:andre.ohlin@umu.se)

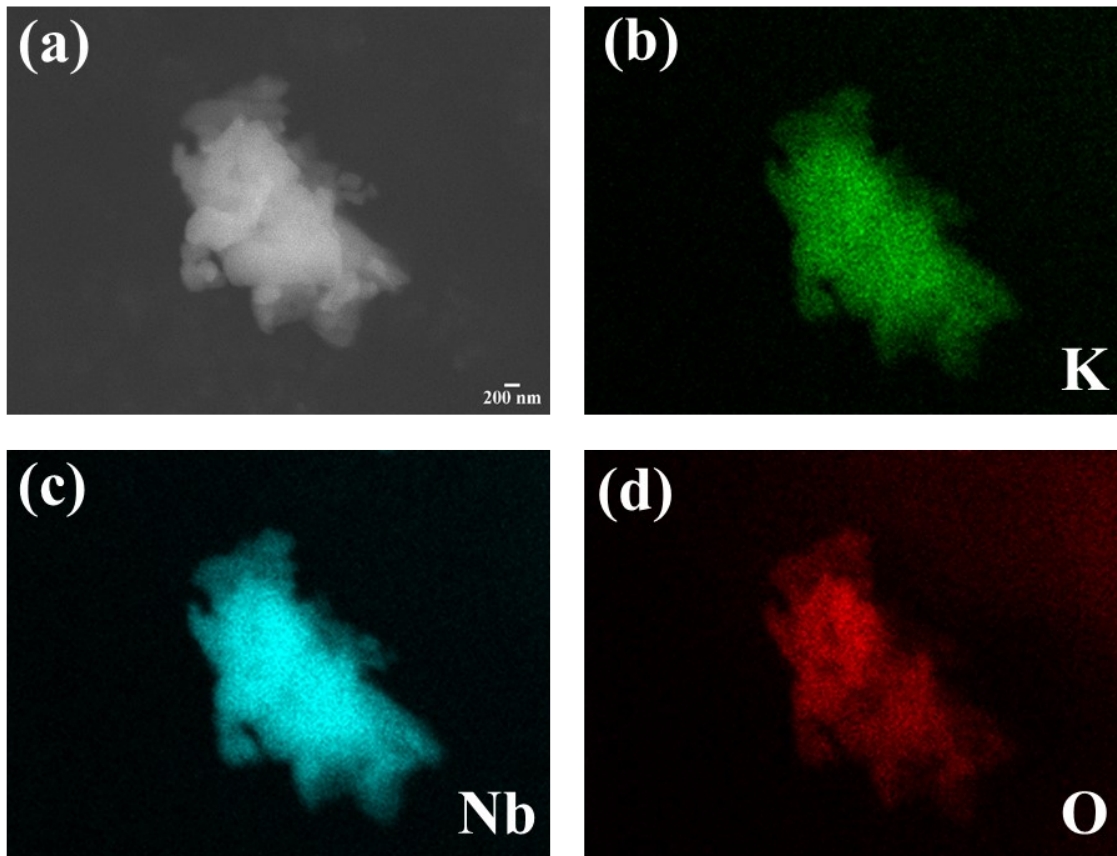

**Figure S1. a-d)** EDX images of KNO material

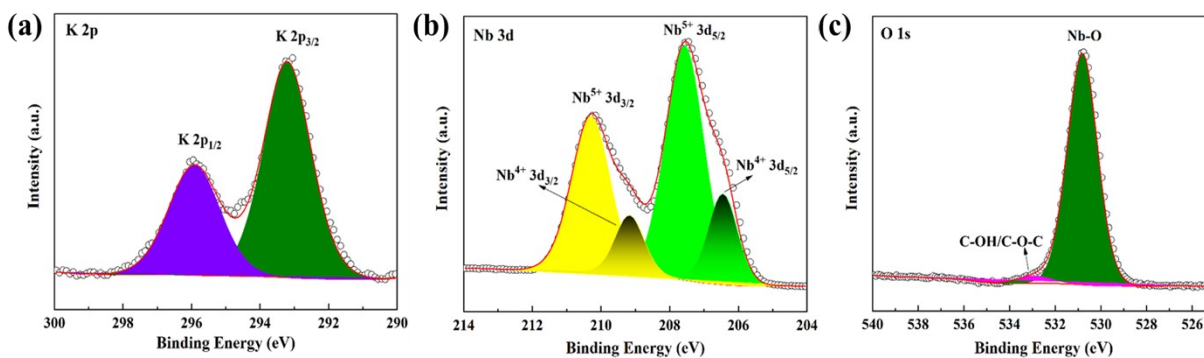

**Figure S2. XPS a) K 2p, b) Nb 3d and c) O 1s spectra of KNO material.**

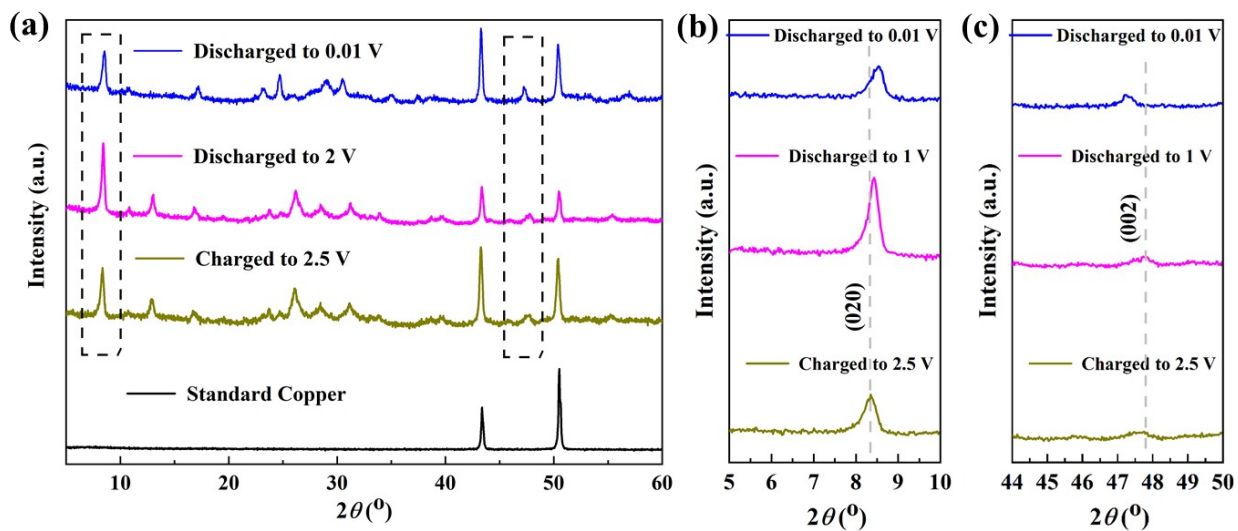

**Figure S3.** a) XRD pattern of standard copper sheet and ex-situ XRD patterns of KNO electrode at various charge/discharge states, and enlarged view of **b)** (020) and **c)** (002) diffraction peaks.
